# Supplementary material for: Dissemination of RasV12-transformed cells requires the mechanosensitive channel Piezo
Source: PubMed Central journal article supplement (PMC7366633; doi:10.1038/s41467-020-17341-y), 2020-07-16
Supplement: 41467_2020_17341_MOESM2_ESM.pdf [file 41467_2020_17341_MOESM2_ESM.pdf]

## Description of Additional Supplementary Files

File Name: Supplementary Movie 1

Description: Video of a representative  $Ras^{V12}$  cell generating blebs and ELEVs (z-projection of 25  $\mu\text{m}$  stack, duration: 4 hours, 6 fps).  $Ras^{V12}$  was induced for 2 days with  $esg^{ts}$ . The cell is captured from Supplemental Video 3. Scale bar is 10  $\mu\text{m}$ .

File Name: Supplementary Movie 2

Description: *Ex vivo* live imaging of day 2  $esg^{ts}$  posterior midgut (z-projection of 25  $\mu\text{m}$  stack, duration: 4 hours, 10 fps).

File Name: Supplementary Movie 3

Description: *Ex vivo* live imaging of day 2  $esg^{ts}>Ras^{V12}$  posterior midgut (z-projection of 25  $\mu\text{m}$  stack, duration: 4 hours, 5 fps). Arrowheads point to the sites of blebbing and ELEV formation.

File Name: Supplementary Movie 4

Description: *Ex vivo* live imaging of day 2  $esg^{ts}>Raf^{gof}$  posterior midgut (z-projection of 25  $\mu\text{m}$  stack, duration: 4 hours, 10 fps).

File Name: Supplementary Movie 5

Description: Bleb mediated dissemination of a  $Ras^{V12}$  cell in the posterior midgut (z-projection of 21  $\mu\text{m}$  stack, duration: 2 hours 16 minutes, 10 fps). Arrowhead indicates blebbing. Arrow points out the detachment of the blebbing cell from the midgut epithelium.

File Name: Supplementary Movie 6

Description: Dissemination of  $Ras^{V12}$  cell in the posterior midgut (z-projection of 25.5  $\mu\text{m}$  stack, duration: 1 hour 40 minutes, 5 fps). White arrow points to a cell that exits the midgut. Still shots are shown in Supplemental Figure 7.

File Name: Supplementary Movie 7

Description: *Ex vivo* live imaging of day 2  $esg^{ts}>Ras^{V12}$ ,  $piezo-i^{8486}$  posterior midgut (z-projection of 25  $\mu\text{m}$  stack, duration: 4 hours, 10 fps).

File Name: Supplementary Movie 8

Description: *Ex vivo* live imaging of day 2  $esg^{ts}>Ras^{V12}$ ,  $piezo-i^{v2796}$  posterior midgut (z-projection of 25  $\mu\text{m}$  stack, duration: 4 hours, 10 fps).

File Name: Supplementary Movie 9

Description: *Ex vivo* live imaging of day 2  $esg^{ts}>Ras^{V12}$ ,  $piezo-i^{8486}$ , *Cortactin-HA* posterior midgut (z-projection of 30  $\mu\text{m}$  stack, duration: 4 hours, 10 fps).
